# Supplementary material for: Chemical Studies of Multicomponent Kidney Stones Using the Modern Advanced Research Methods
Source: MDPI journal article supplement (doi:10.3390/molecules28166089), 2023-08-16
Supplement: s1 [file s1]

Supplementary Material

# Chemical studies of multicomponent kidney stones using the modern advanced research methods

Weronika Sofińska-Chmiel <sup>1</sup>, Marta Goliszek <sup>1</sup>, Marek Drewniak <sup>1</sup>, Aldona Nowicka <sup>1</sup>, Marcin Kuśmierz <sup>1</sup>, Agnieszka Adamczuk <sup>2</sup>, Paulina Malinowska <sup>1</sup>, Ryszard Maciejewski <sup>3,4</sup>, Małgorzata Tatarczak-Michalewska <sup>5,\*</sup> and Eliza Blicharska <sup>5,\*</sup>

## AREA A

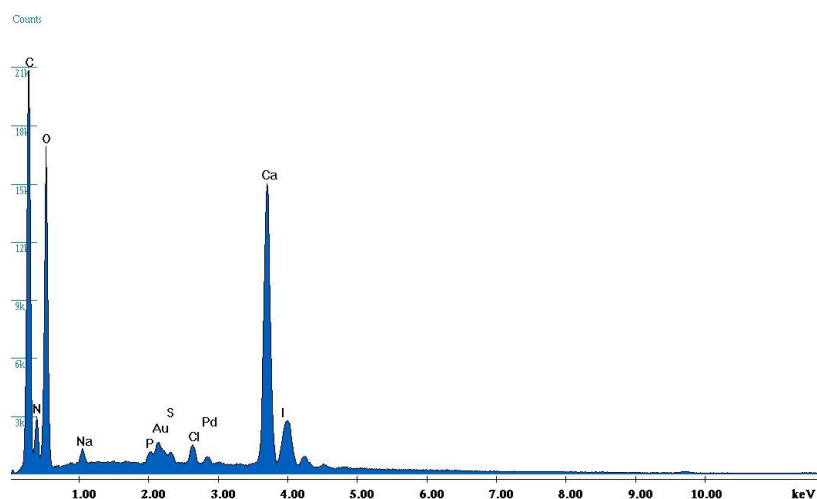

## AREA B

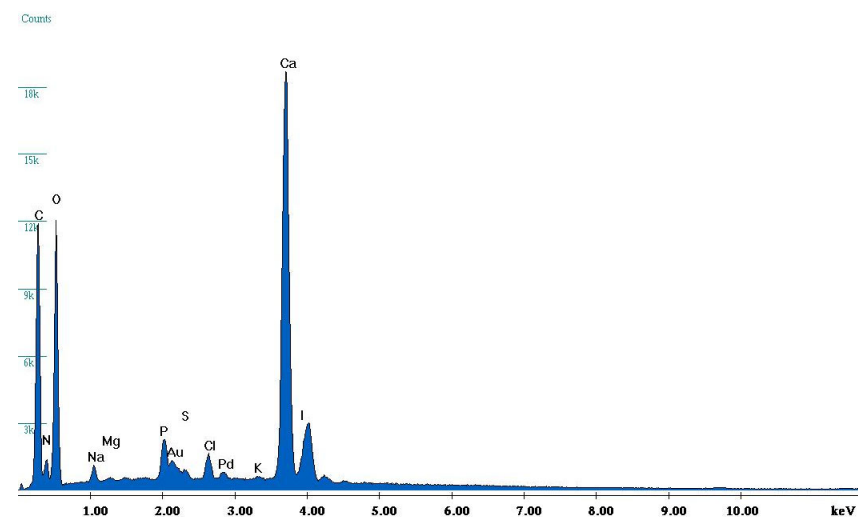

## AREA C

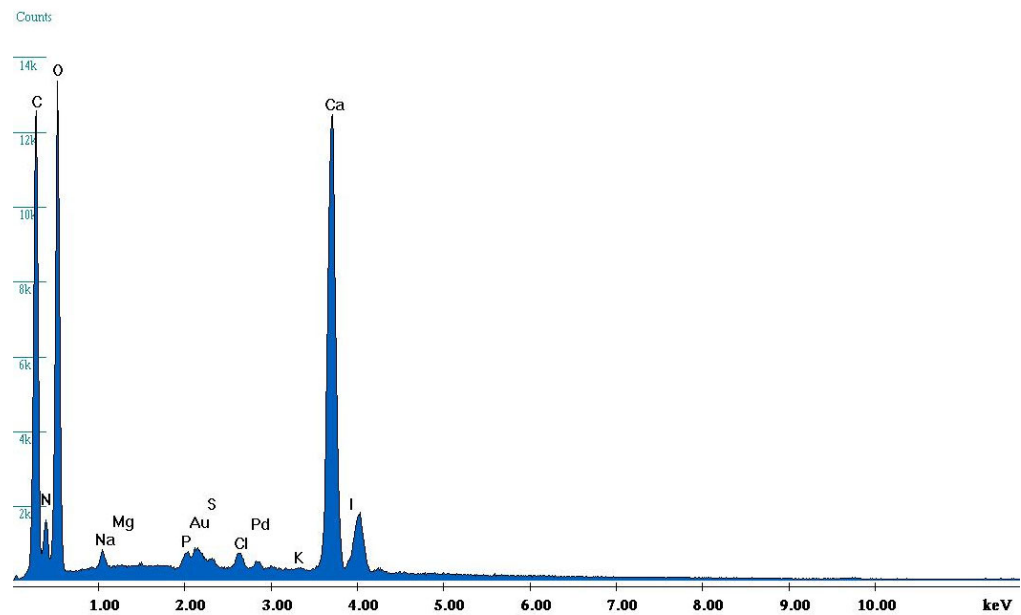

Figure S1. EDS-spectrograms of the sample 35.

## AREA A

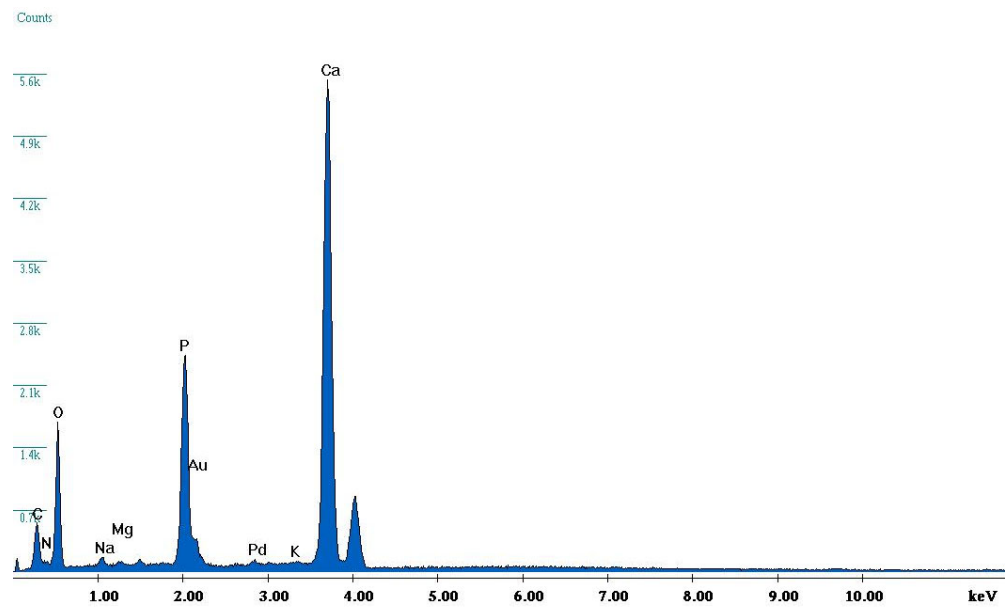

## AREA B

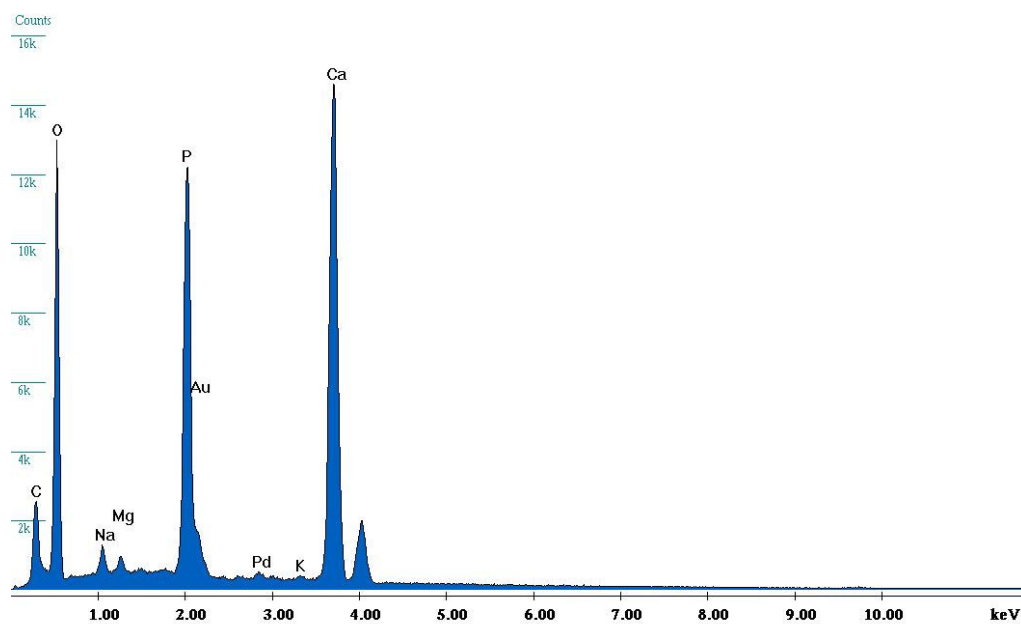

### AREA C

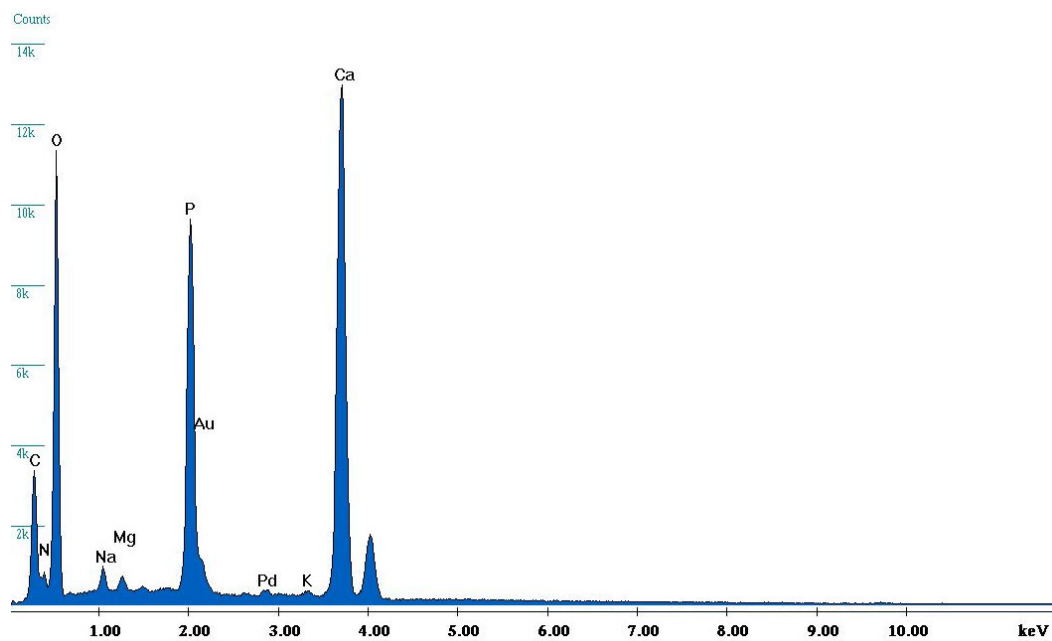

Figure S2. EDS-spectrograms of the sample 37.

## AREA A

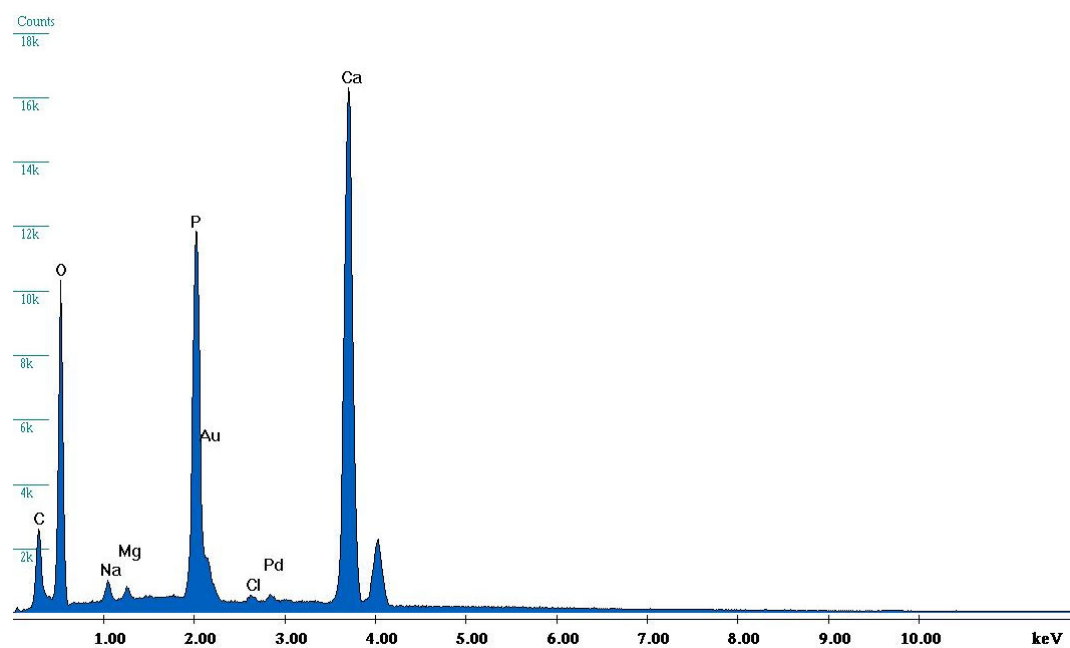

## AREA B

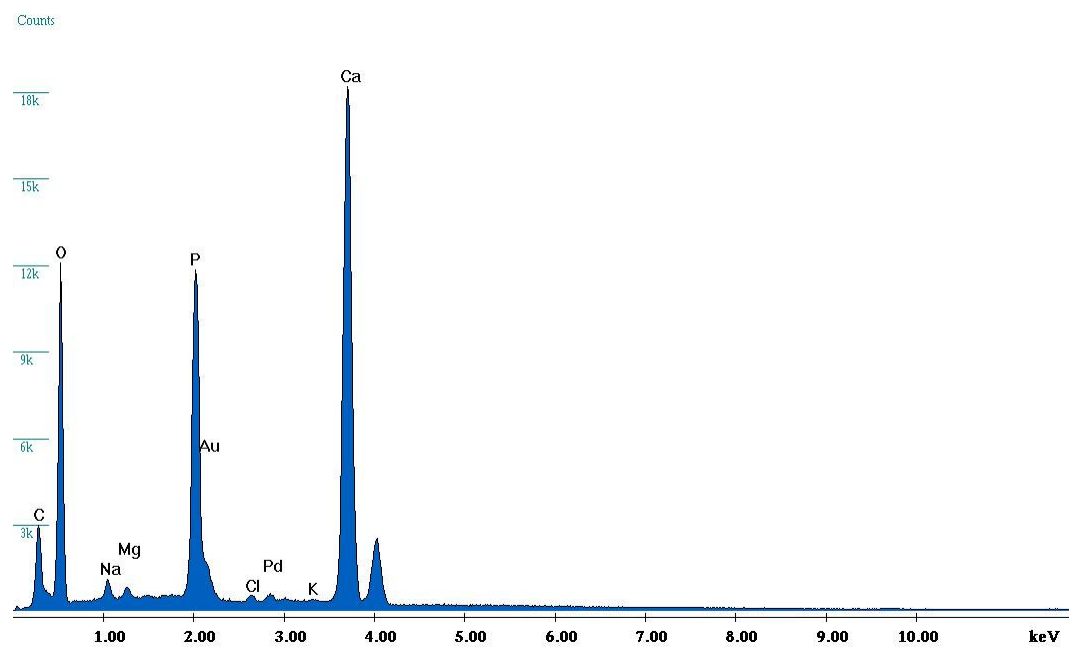

## AREA C

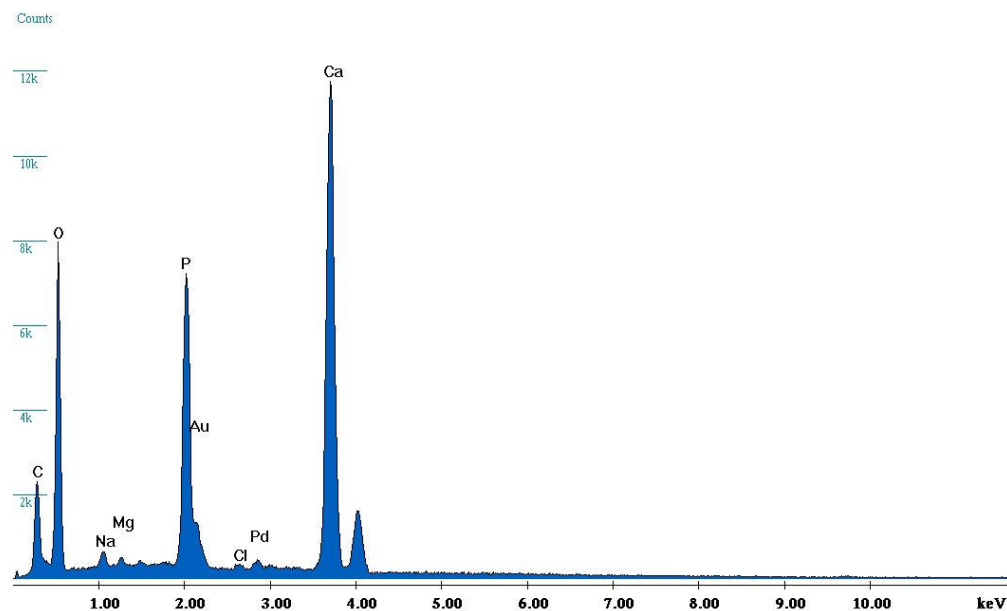

Figure S3. EDS-spectrograms of the sample 43.

The samples were sputtered with a Pd/Au target. These elements were not included in the process of generating the elemental composition using the software for the EDS Octane Elect Plus detector.
